# Supplementary material for: The characteristics of ctDNA reveal the high complexity in matching the corresponding tumor tissues
Source: Springer Nature journal article supplement (doi:10.1186/s12885-018-4199-7), 2018-03-22
Supplement: MOESM1 [file 15560432]

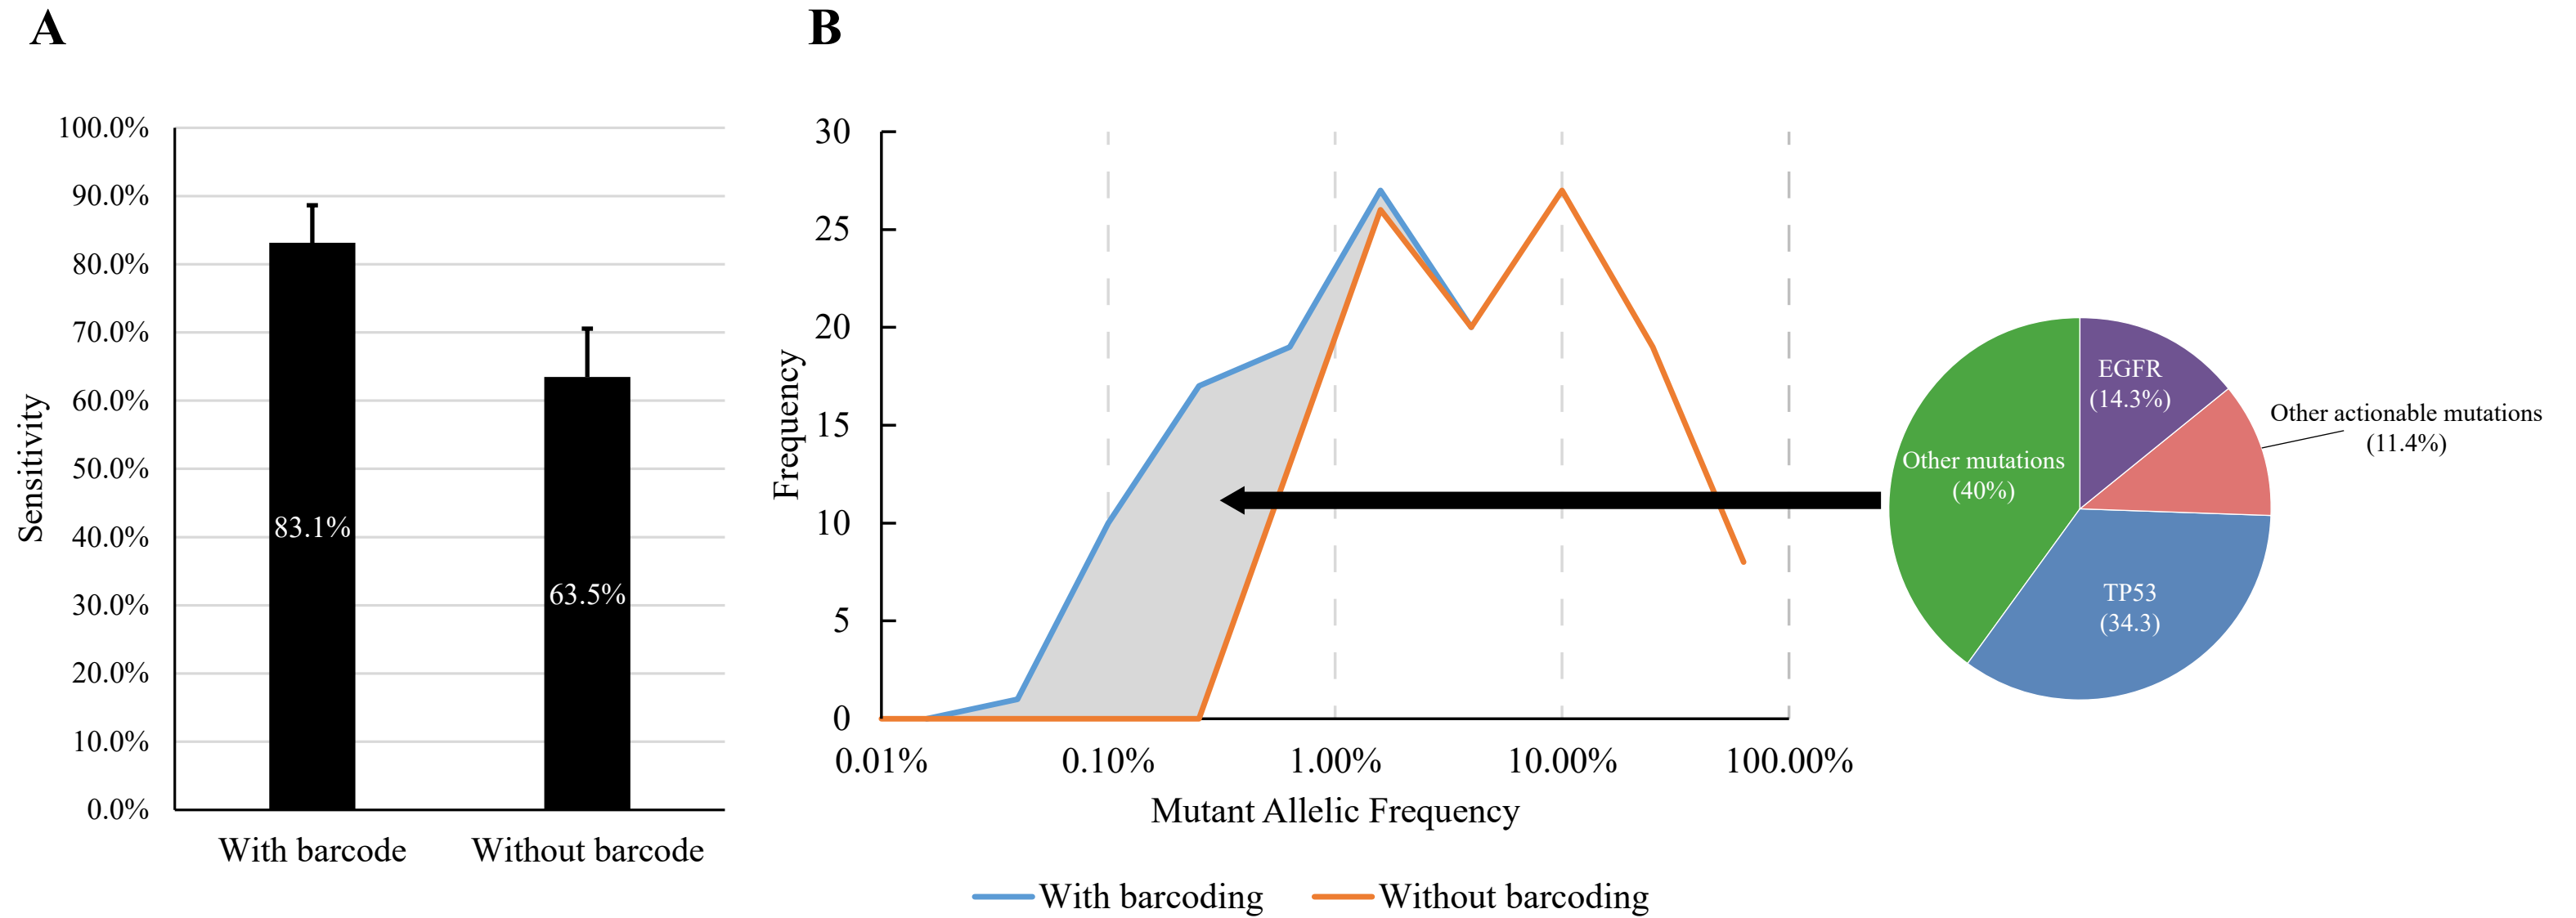

Figure S1. UC-Seq significantly improve the sensitivity of mutation detection in ctDNA. (A) Sensitivity of ctDNA detection with or without barcoding. (B) Distribution of mutant allelic frequencies (AFs) in ctDNA with or without barcoding.
