# Supplementary material for: The characteristics of ctDNA reveal the high complexity in matching the corresponding tumor tissues
Source: Springer Nature journal article supplement (doi:10.1186/s12885-018-4199-7), 2018-03-22
Supplement: MOESM2 [file 15560432]

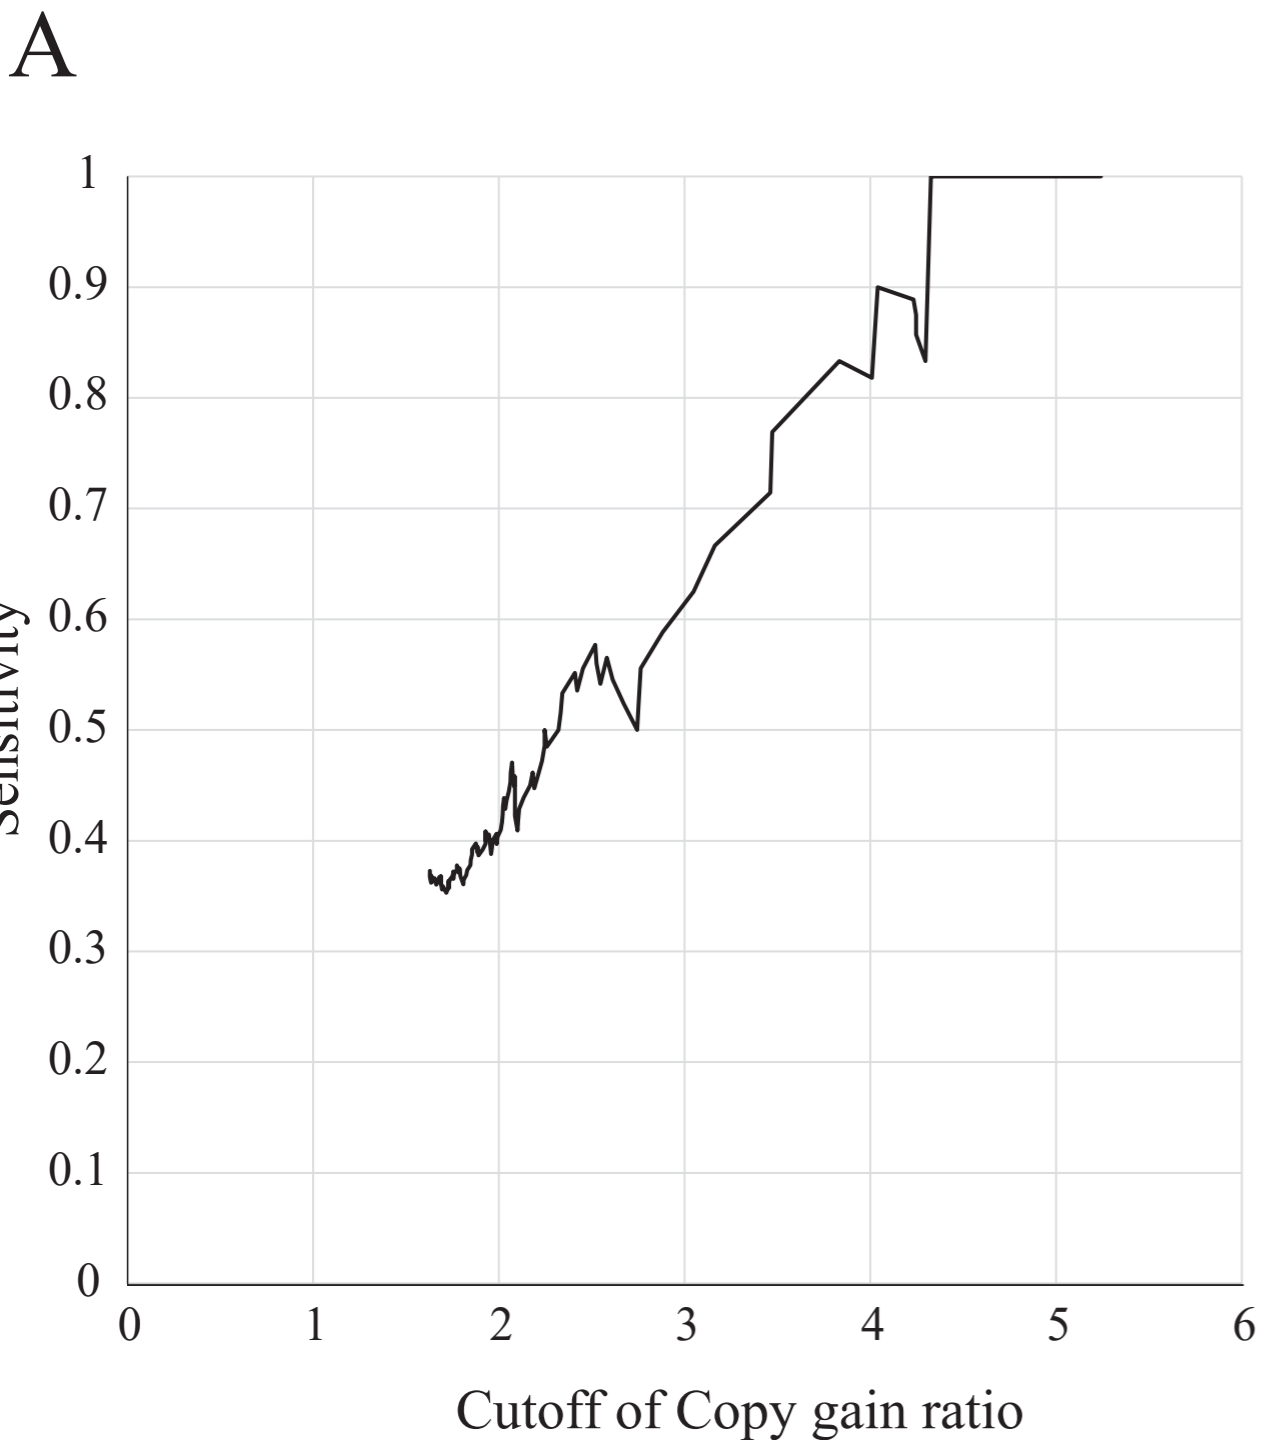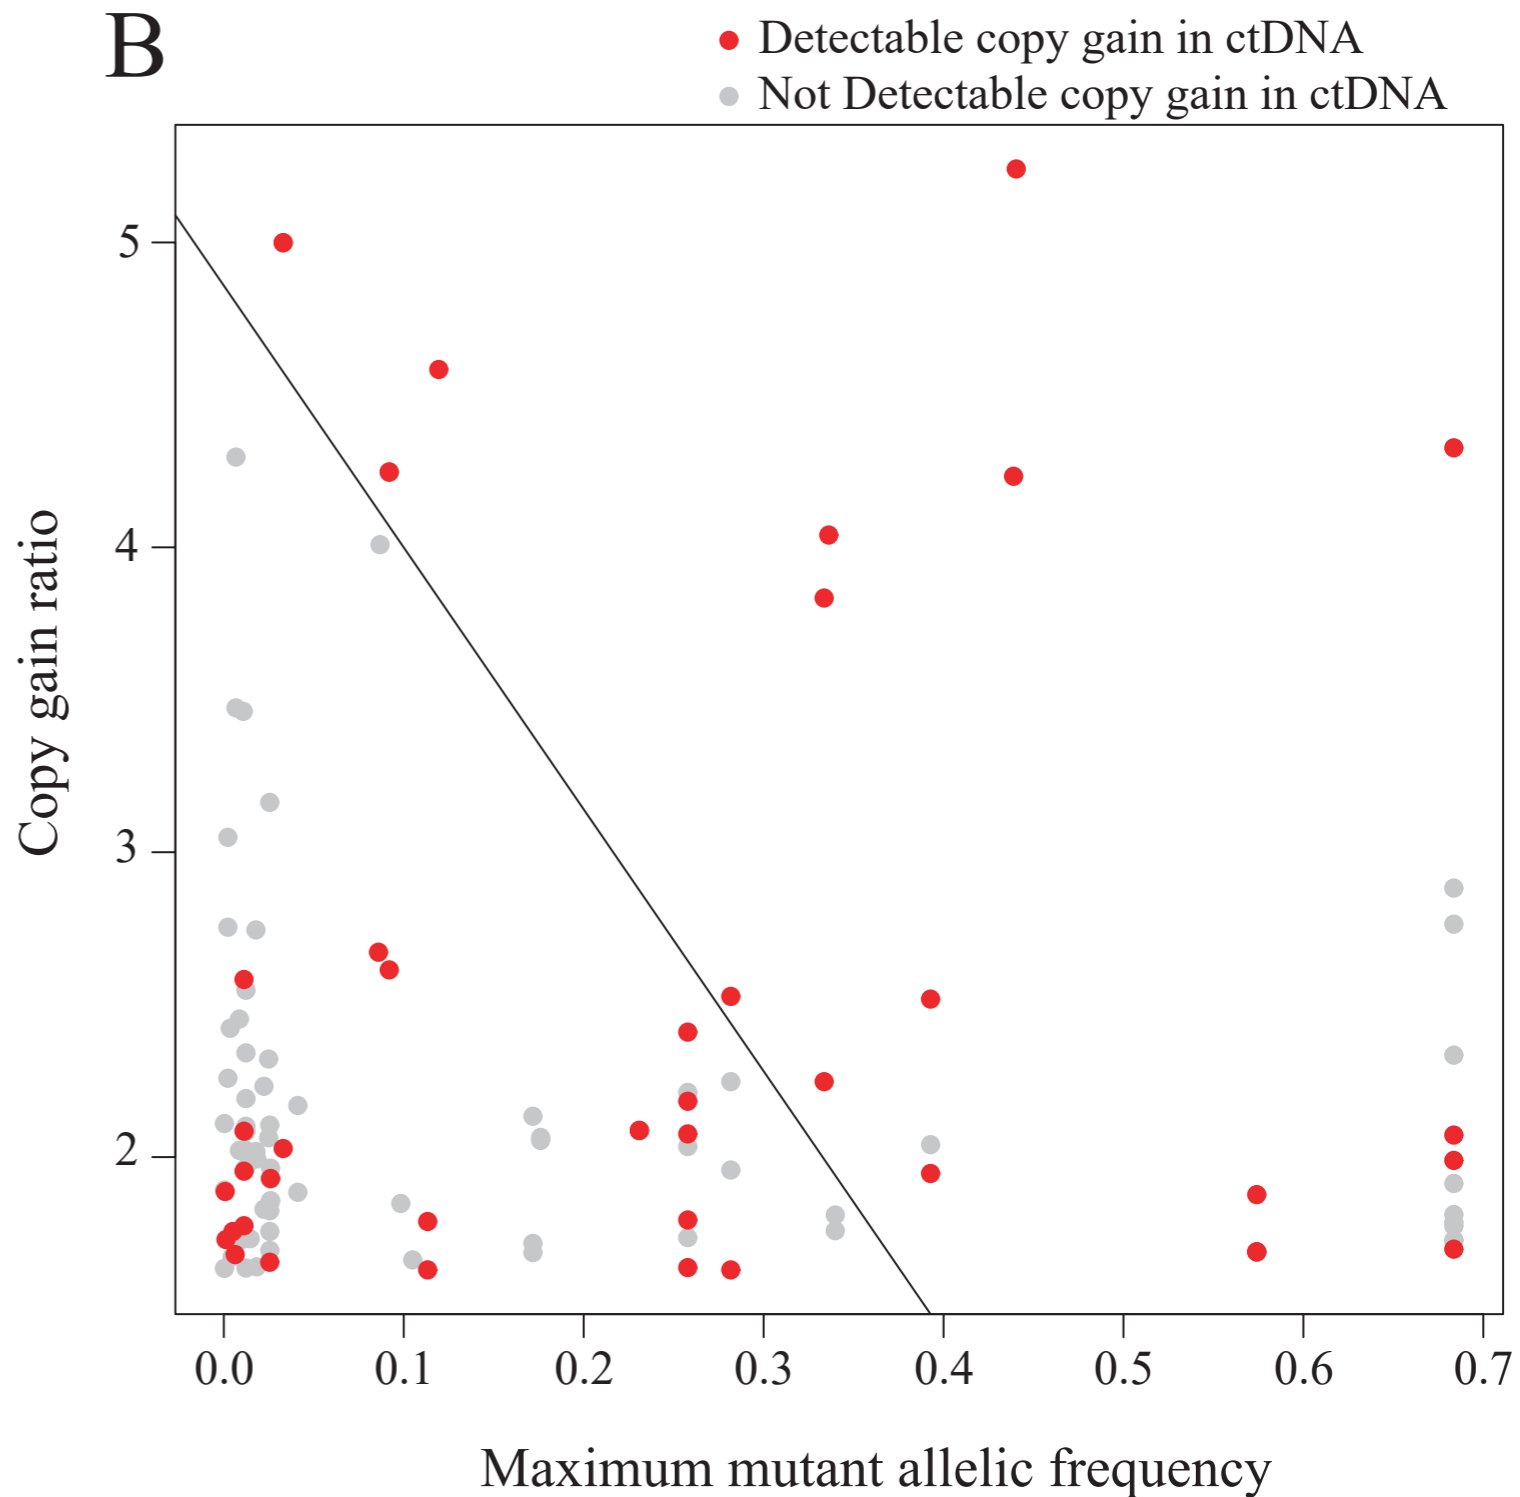

Figure S2. The sensitivity of copy gain detection was affected by the copy gain ratio in corresponding tumor tissues. (A) The curve of sensitivity varied with the decreasing of the copy gain ratio cut-offs in corresponding tumor tissues. (B) Scatter plot of maximum MAFs in ctDNA versus copy gain ratio in corresponding tumor tissues.
